# Supplementary material for: Feasibility of a Novel Therapist-Assisted Feedback System for Gait Training in Parkinson’s Disease
Source: MDPI journal article supplement (doi:10.3390/s23010128), 2022-12-23
Supplement: s1 [file s1]

Supplementary Figure S1.

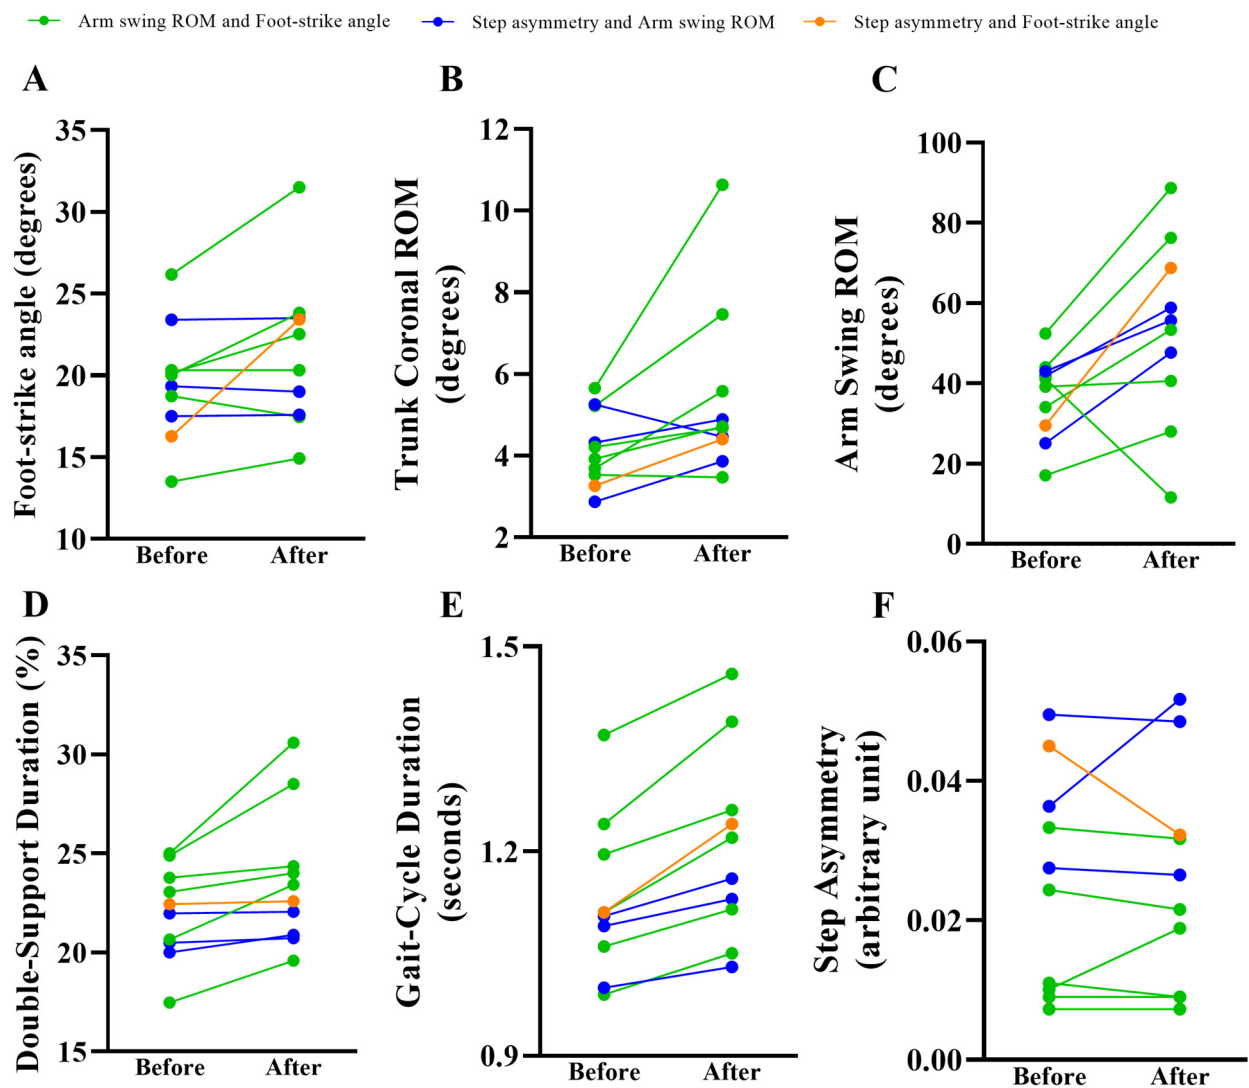

**Supplementary Figure S1.** Individual values for the foot-strike angle (A), trunk coronal range-of-motion (ROM) (B), arm swing range-of-motion (C), double-support duration (D), gait-cycle duration (E), and step asymmetry (F) before and after one session of treadmill gait training with Mobility Rehab in 10 people with Parkinson's disease. Colours represent gait metrics selected to train people with PD.
